# Supplementary material for: A holistic high-throughput screening framework for biofuel feedstock assessment that characterises variations in soluble sugars and cell wall composition in Sorghum bicolor
Source: PubMed Central journal article supplement (PMC3892131; doi:10.1186/1754-6834-6-186), 2013-12-23

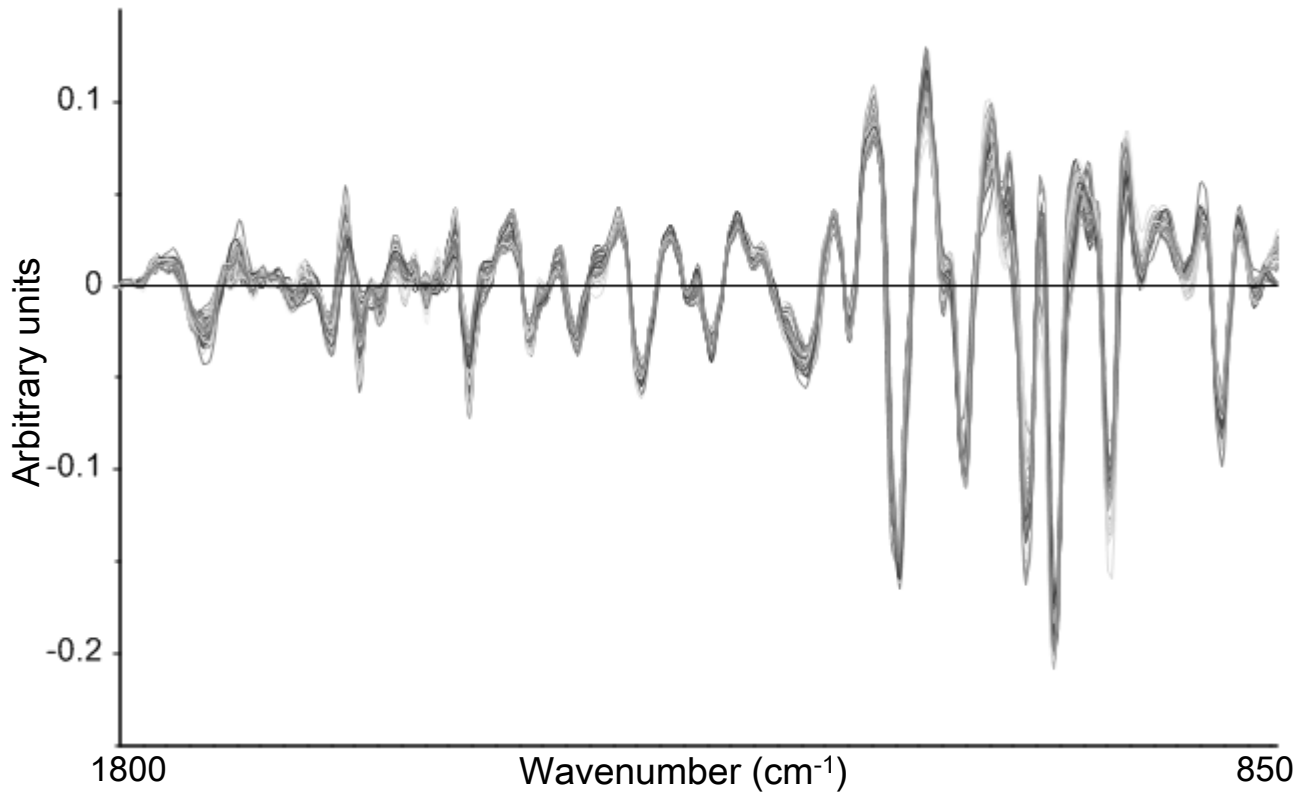

Supplement: 1754-6834-6-186-S8.pdf [file 1754-6834-6-186-S8.pdf]
